# Supplementary material for: Antidiabetic potential of polyoxotungstates: in vitro and in vivo studies
Source: Royal Society of Chemistry journal article supplement (doi:10.1039/c4mt00106k), 2014-01-01
Supplement: c4mt00106k1.pdf [file c4mt00106k1.pdf]

### Synthesis of the compounds

The Polyoxotungstates (POTs) used in this study were synthesized according to the previously reported procedures (ref.52)

**Na<sub>6</sub>[H<sub>2</sub>W<sub>12</sub>O<sub>40</sub>]·2H<sub>2</sub>O (Na-W<sub>12</sub>O<sub>40</sub>):** Compound **Na-W<sub>12</sub>O<sub>40</sub>** was synthesized using ammonium (meta)-tungstate (NH<sub>4</sub>)<sub>6</sub>[H<sub>2</sub>W<sub>12</sub>O<sub>40</sub>] and sodium ion-exchange using column of Dowex 50WX8.

Ethanol was added to the resulting solution which led to the precipitation of the final product.

**Na<sub>20</sub>[P<sub>6</sub>W<sub>18</sub>O<sub>79</sub>]·37H<sub>2</sub>O (Na-P<sub>6</sub>W<sub>18</sub>):** It was synthesized by the following procedure, glacial acetic acid (8.4 mL) was added slowly to a solution containing 50 g of Na<sub>2</sub>WO<sub>4</sub>·2H<sub>2</sub>O and 3.5 mL of 85% H<sub>3</sub>PO<sub>4</sub> in 50 mL of water. After evaporation at 100 °C a good yield of white crystalline precipitates were obtained.

**Na<sub>33</sub>H<sub>7</sub>[P<sub>8</sub>W<sub>48</sub>O<sub>184</sub>]·92H<sub>2</sub>O (Na-P<sub>8</sub>W<sub>48</sub>):** It was prepared by a similar ion-exchange method as mentioned for **Na-W<sub>12</sub>O<sub>40</sub>**.

**Na<sub>16</sub>[(O<sub>3</sub>POPO<sub>3</sub>)<sub>4</sub>W<sub>12</sub>O<sub>36</sub>]·38H<sub>2</sub>O (Na-OP<sub>8</sub>W<sub>12</sub>) and Na<sub>16</sub>[(O<sub>3</sub>PCH<sub>2</sub>PO<sub>3</sub>)<sub>4</sub>W<sub>12</sub>O<sub>36</sub>]·16H<sub>2</sub>O**

**(Na-OCP<sub>8</sub>W<sub>12</sub>):** These compounds were in the following method, for **Na-OP<sub>8</sub>W<sub>12</sub>**, 50 mL of 0.5 M sodium diphosphate was added to 150 mL of 0.5 M sodium tungstate solution in H<sub>2</sub>O at room temperature and pH was adjusted to 4 with conc. HCl. For compound **Na-OCP<sub>8</sub>W<sub>12</sub>**, methylenediphosphonic acid was used instead of sodium diphosphate and pH was adjusted to 6.

The final products were obtained by addition of dimethyl sulfoxide to the resulting solutions.

**Na<sub>10</sub>[H<sub>2</sub>W<sub>12</sub>O<sub>42</sub>]·27H<sub>2</sub>O (Na-W<sub>12</sub>O<sub>42</sub>):** The compound was synthesized by the following method, 5 g of Na<sub>2</sub>WO<sub>4</sub>·2H<sub>2</sub>O was dissolved in 10 mL H<sub>2</sub>O, followed by addition of HCl (~10%) until pH 7.4, with continuous stirring. Resulting solution was filtered and crystallized at room temperature. The colorless crystals appeared within few days.

**Na<sub>6</sub>[TeW<sub>6</sub>O<sub>24</sub>]·22H<sub>2</sub>O (Na-TeW<sub>6</sub>):** Compound **Na-TeW<sub>6</sub>** was synthesised in the following way,

5.00 g of  $\text{Na}_2\text{WO}_4 \cdot 2\text{H}_2\text{O}$  and 0.60 g of  $\text{Te}(\text{OH})_6$  were dissolved in 100 mL  $\text{H}_2\text{O}$ . A 1 M HCl was used to adjust pH at 5.0. The resulting solution was heated at 100 °C. After 25% reduction in volume, it was cooled, filtered and allowed to crystallize at room temperature. Colorless crystals of **Na-TeW<sub>6</sub>** were obtained after ca. one week, filtered off and air dried.

The identification of the products were achieved using modern spectroscopic methods, i.e. FT-IR and  $^{183}\text{W}$  NMR spectrometry.
